# Use of Intranasal Fentanyl in Children Undergoing Myringotomy and Tube Placement during Halothane and Sevoflurane Anesthesia

Jeffrey L. Galinkin, M.D.,\* Lisa M. Fazi, M.D.,† Romulo M. Cuy, M.D.,‡ Rosetta M. Chiavacci, R.N., B.S.N.,§ C. Dean Kurth, M.D.,|| Udayan K. Shah, M.D.,# Ian N. Jacobs, M.D.,\*\* Mehermoor F. Watcha, M.D.††

**Background:** Many children are restless, disoriented, and inconsolable immediately after bilateral myringotomy and tympanosotomy tube placement (BMT). Rapid emergence from sevoflurane anesthesia and postoperative pain may increase emergence agitation. The authors first determined serum fentanyl concentrations in a two-phase study of intranasal fentanyl. The second phase was a prospective, placebo-controlled, double-blind study to determine the efficacy of intranasal fentanyl in reducing emergence agitation after sevoflurane or halothane anesthesia.

**Methods:** In phase 1, 26 children with American Society of Anesthesiologists (ASA) physical status I or II who were scheduled for BMT received intranasal fentanyl, 2  $\mu\text{g}/\text{kg}$ , during a standardized anesthetic. Serum fentanyl concentrations in blood samples drawn at emergence and at postanesthesia care unit (PACU) discharge were determined by radioimmunoassay. In phase 2, 265 children with ASA physical status I or II were randomized to receive sevoflurane or halothane anesthesia along with either intranasal fentanyl (2  $\mu\text{g}/\text{kg}$ ) or saline. Postoperative agitation, Children's Hospital of Eastern Ontario Pain Scale (CHEOPS) scores, and satisfaction of PACU nurses and parents with the anesthetic technique were evaluated.

**Results:** In phase 1, the mean fentanyl concentrations at 10  $\pm$  4 min (mean  $\pm$  SD) and 34  $\pm$  9 min after administering intranasal fentanyl were 0.80  $\pm$  0.28 and 0.64  $\pm$  0.25 ng/ml, respectively. In phase 2, the incidence of severe agitation, highest CHEOPS scores, and heart rate in the PACU were decreased with intranasal fentanyl. There were no differences between sevoflurane and halothane in these measures and in times to hospital discharge. The incidence of postoperative vomiting, hypoxemia, and slow respiratory rates were not increased with fentanyl.

**Conclusions:** Serum fentanyl concentrations after intranasal administration exceed the minimum effective steady state concentration for analgesia in adults. The use of intranasal fentanyl during halothane or sevoflurane anesthesia for BMT is associated with diminished postoperative agitation without an increase in vomiting, hypoxemia, or discharge times. (Key words: Agitation; analgesia; anesthetics; delirium; pediatric anesthesia; pharmacokinetics; postoperative complications.)

\* ‡ Assistant Professor, † Instructor, || †† Associate Professor, Department of Anesthesiology and Critical Care Medicine, #\*\* Assistant Professor, Department of Otolaryngology, University of Pennsylvania. § Research Nurse, Department of Anesthesiology and Critical Care Medicine, Children's Hospital of Philadelphia.

Received from the Departments of Anesthesiology and Critical Care Medicine and Otolaryngology, University of Pennsylvania, Philadelphia, Pennsylvania; and the Department of Anesthesiology and Critical Care Medicine, Children's Hospital of Philadelphia, Philadelphia, Pennsylvania. Submitted for publication March 23, 2000. Accepted for publication June 23, 2000. Supported in part by Public Health Services Research Grant No. M01-RR00240 from the National Institutes of Health, Bethesda, Maryland. Presented at the annual meetings of the Society for Pediatric Anesthesia, Las Vegas, Nevada, February 20, 1999, Ft. Meyers, Florida, February 26, 2000, and the American Society of Anesthesiologists, Dallas, Texas, October 11, 1999.

Address reprint requests to Dr. Galinkin: Department of Anesthesia and Critical Care, Children's Hospital of Philadelphia, 34th and Civic Center Boulevard, Philadelphia, Pennsylvania 19104. Address electronic mail to: galinkin@email.chop.edu. Individual article reprints may be purchased through the Journal Web site, www.anesthesiology.org.

BILATERAL myringotomy and tympanosotomy tube placement (BMT) is performed in approximately one million children annually in the United States, making it the most common pediatric surgical operation.<sup>1</sup> This ultrashort procedure is typically performed with the patient spontaneously breathing potent inhalation anesthetics and often without intravenous access. However, 25-50% of children undergoing BMT emerge from anesthesia restless, disoriented, and inconsolable.<sup>2-5</sup> Sevoflurane, an inhalation agent with low solubility, is associated with a rapid induction and recovery with minimal airway irritation and cardiac depression, making it popular for BMT procedures. The benefits of faster emergence with sevoflurane compared with halothane anesthesia may be offset by increased emergence agitation.<sup>3,6-8</sup> Postoperative pain has also been implicated as one of the many contributing factors for postoperative agitation.<sup>6,9-13</sup> However, it is especially difficult to differentiate between pain-related behavior and emergence agitation in the young, preschool child.<sup>14,15</sup>

Although this postoperative agitation is self-limiting, in our experience it is a major source of dissatisfaction for parents, nurses, and others taking care of these children. The absence of intravenous access makes it particularly difficult to achieve rapid control of these symptoms. Some investigators have recommended the routine prophylactic use of acetaminophen and nonsteroidal anti-inflammatory drugs such as ketorolac and ibuprofen before emergence from anesthesia.<sup>4,5,12,16,17</sup> However, 30-55% of children receiving these medications required additional analgesia.<sup>3,12,17</sup> These findings suggest that more potent analgesics may be required.<sup>2,5</sup>

In the past, intravenous fentanyl 1-2  $\mu\text{g}/\text{kg}$  has been used to treat postoperative agitation in children.<sup>6,13</sup> The intranasal route of opioid administration is an effective and rapid method of achieving analgesia in adults and children when intravenous access is not available.<sup>18-24</sup> However, there are no data available on the serum concentrations of fentanyl achieved with this route in children, and no data on the efficacy of intranasal fentanyl in reducing the incidence of postoperative agitation after halothane or sevoflurane anesthesia for BMT.

This two-phase study was designed to determine the efficacy of intranasal fentanyl in decreasing the incidence of adverse postanesthetic agitation after BMT in children. The first phase was an open-label study to determine serum concentrations after a single intraoperative nasal fentanyl dose (2  $\mu\text{g}/\text{kg}$ ). The second phase

was a double-blind placebo-controlled trial to determine the effect of intranasal fentanyl on the incidence of agitation after sevoflurane and halothane anesthesia in children undergoing BMT.

## Materials and Methods

A total of 291 children (26 in phase 1 and 265 in phase 2) were studied after obtaining approval from the Children's Hospital Institutional Review Board (Children's Hospital of Philadelphia, Philadelphia, PA) and written informed consent from the parents or legal guardians. We limited enrollment in both phases to healthy children with American Society of Anesthesiologists (ASA) physical status I or II, age 9 months to 6 yr, and weight  $\leq 25$  kg, who were scheduled for BMT procedures. All patients were fasted for 8 h for solids and 2 h for clear liquids. Patients with an allergy to fentanyl or midazolam or a history suggestive of an increased risk for developing malignant hyperthermia were excluded. We also excluded children who were at risk of airway obstruction (obstructive sleep apnea and craniofacial syndromes) or who had neurodevelopmental delay, cardiopulmonary disease, or an active history of untreated gastroesophageal reflux. All patients received acetaminophen 10 mg/kg and midazolam 0.5 mg/kg orally as preanesthetic medication approximately 30 min before induction of anesthesia.

### Phase 1

After applying ASA-approved standard noninvasive monitoring, anesthesia was induced and maintained with sevoflurane and nitrous oxide *via* a facemask with spontaneous ventilation and additional ventilatory support if necessary. Fentanyl (50  $\mu\text{g}/\text{ml}$ ) 2  $\mu\text{g}/\text{kg}$  was administered intranasally (1  $\mu\text{g}/\text{kg}$  in each nostril in four equal [0.5  $\mu\text{g}/\text{ml}$ ] aliquots from a 1-ml syringe over 2–5 s) before the start of surgery, and the time was recorded. Patients with nasal congestion had their nostrils suctioned before intranasal fentanyl administration. All subjects then had an intravenous cannula inserted. A 2-ml aliquot of blood was drawn at the completion of surgery (time 1) and just before discharge from phase 1 postanesthesia care unit (PACU), approximately 30 min after arrival (time 2). Samples were immediately centrifuged, separated, and frozen at  $-70^\circ\text{C}$  as per protocol for analysis. Fentanyl concentrations were determined by radioimmunoassay (Janssen Pharmaceutica, Beerse, Belgium).<sup>24</sup> This method has a minimum detectable concentration of 0.08 ng/ml with an intraassay and interassay coefficient of variability ranging from 4.6% to 5.9% and 5.0% to 7.1%, respectively.<sup>24</sup>

### Phase 2

We proceeded to phase 2 of the study after the results of phase 1 showed serum concentrations were achieved

in all subjects with intranasal fentanyl administration. In phase 2, 265 subjects were enrolled and randomly assigned to one of four study groups, according to a computer-generated random number table. Anesthesia was induced and maintained with sevoflurane–nitrous oxide in oxygen in groups 1 and 2, and with halothane–nitrous oxide in oxygen in groups 3 and 4. Fentanyl, 2  $\mu\text{g}/\text{kg}$ , was administered intranasally to groups 1 and 3, whereas groups 2 and 4 received saline placebo intranasally. Patients were permitted to breathe spontaneously, and ventilation was assisted when required. Preanesthetic medications and perioperative monitoring for phase 2 were the same as for phase 1.

In this phase it was not possible to blind the person administering the anesthetic regarding the use of sevoflurane or halothane, but they were informed of the group assignment only after enrollment of the child. The research observer, patient, parent, and nurses in the PACU were blinded to the inhalation agent used. The anesthesiologist, research observer, patient, parents, and PACU nurse were all blinded to the intranasal solution administered, which was drawn up by a third party who had no further involvement in the study.

After induction of anesthesia but before the start of surgery, the assigned intranasal solution was administered as in the first phase of the study, and the time was recorded. Nasal congestion was cleared by suction before administration of intranasal study drug. Adverse events such as hypoxemia, chest wall rigidity, laryngospasm, coughing, or bronchospasm were noted. The surgeon assessed the severity of the ear disease using a previously described rating scale.<sup>3</sup>

The research observer recorded the subject's postoperative behavior and assessed the child's pain at 0, 5, 15, 30, 45, 60, 75, 90, 105, 120 min after arrival in the PACU. Postoperative behavior was assessed using a 1–4 scale (1 = calm; 2 = not calm but could easily be consoled; 3 = not easily calmed, moderately agitated, or restless; and 4 = combative, excited, or disoriented, thrashing around).<sup>2,6</sup> Pain assessments were made using the Children's Hospital of Eastern Ontario Pain Scale (CHEOPS), a validated multifactorial pain scale based on scores for cry, facial expression, verbal expression, and movement in infants and children.<sup>25</sup> In addition, the observer recorded heart rate, blood pressure, oxygen saturation, the need for supplemental oxygen, episodes of vomiting, adverse respiratory events (hypoxemia, respiratory rate  $\leq 16$ , laryngospasm, bronchospasm), and the time to achieve standard discharge criteria from both recovery phases. The nurses in phases 1 and 2 of the PACU assessed their satisfaction with patient behavior, using a 100-mm visual analog scale (0 = not satisfied, 100 = completely satisfied). Parents were contacted *via* telephone 24 h after surgery to determine the child's analgesic requirement, the incidence of nausea and vomiting, and time taken to return to the preoperative

**Table 1. Demographic Data, Severity of Ear Discharge, Duration of Surgery, Anesthesia, and Hospital Stay in the Four Study Groups**

|                                       | Sevoflurane +<br>Nasal Fentanyl | Sevoflurane +<br>Nasal Placebo | Halothane +<br>Nasal Fentanyl | Halothane +<br>Nasal Placebo |
|---------------------------------------|---------------------------------|--------------------------------|-------------------------------|------------------------------|
| N                                     | 64                              | 69                             | 66                            | 61                           |
| Age (months)                          | 24 ± 15                         | 24 ± 15                        | 27 ± 16                       | 24 ± 15                      |
| Weight (kg)                           | 12.5 ± 3.3                      | 12.5 ± 2.9                     | 13.2 ± 3.2                    | 12.5 ± 3.1                   |
| Gender (M/F)                          | 42/22                           | 49/20                          | 36/30                         | 39/22                        |
| Severity of ear disease               |                                 |                                |                               |                              |
| Median score (interquartile range)    | 3 (1–4)                         | 3 (1–4)                        | 3 (1–4)                       | 2 (1–3)                      |
| Duration of surgery (min)             | 5.1 ± 1.7                       | 5.0 ± 1.7                      | 4.8 ± 1.9                     | 5.0 ± 1.7                    |
| Duration of anesthesia (min)          | 10.1 ± 3.2                      | 10.2 ± 2.9                     | 10.7 ± 3.9                    | 10.4 ± 6.6                   |
| Time (min) from end of surgery until: |                                 |                                |                               |                              |
| Ready for discharge from hospital     | 68 ± 26                         | 66 ± 23                        | 73 ± 22                       | 70 ± 20                      |
| Actual discharge from hospital        | 83 ± 27                         | 82 ± 23                        | 91 ± 36                       | 84 ± 28                      |

baseline state. Parents were also asked to rate their satisfaction with the anesthetic care on a 0–10-point verbal rating scale (0 = not satisfied, 10 = completely satisfied).

### Statistical Analysis

**Phase 1.** Mean serum fentanyl concentrations were calculated. The incidence of nondetectable concentrations (< 0.08 ng/ml) was also noted.

**Phase 2.** The primary end point of the study was the incidence of severe postoperative agitation, which was defined as a behavior rating scale of 4. Sample size calculations were based on a comparison of proportions in independent samples. We assumed the incidence of adverse behavior in the placebo group would be 25%<sup>5,12,16</sup> and considered a reduction in this incidence to 5% to be of clinical importance. A sample size of 60 in each group would give an 80% chance of detecting this difference at the 0.05 level of significance ( $\alpha = 0.05$ ,  $\beta = 0.2$ ). We recruited 66 patients per group or a total of 264 patients to allow for a possible 10% drop-out rate.

Continuous variables with a normal distribution were compared among groups using one-way analysis of variance tests. If a significant difference was noted, intergroup comparisons were made using the Student-Neuman-Keuls test. If these variables did not have a normal distribution, nonparametric Kruskal-Wallis analysis of variance was used. Categorical variables were compared using a chi-square test with continuity correction or a Fisher exact test where applicable. Data are presented as mean ± SD values for normally distributed data, median with interquartile range for skewed data, and number or percentage. A *P* value less than 0.05 was considered statistically significant.

## Results

### Phase 1

We obtained blood samples from all 26 patients at time 1 (10 ± 4 min after administering intranasal fentanyl) and 25 of 26 patients at time 2 (34 ± 9 min after

intranasal administration). All children had detectable levels of fentanyl at both time points. Serum concentrations at time 1 were 0.80 ± 0.28 ng/ml (range, 0.24–1.43 ng/ml) and at time 2 were 0.64 ± 0.25 ng/ml (range, 0.30–1.12 ng/ml). There were no adverse respiratory events related to study drug administration.

### Phase 2

Two hundred sixty-five patients were enrolled, but protocol violations occurred in five cases. In four of them there was an inadvertent use of both inhalation agents (halothane and sevoflurane). One patient developed laryngospasm on induction of anesthesia before the intranasal solution was administered. This patient required succinylcholine and tracheal intubation. These five patients were excluded from the analysis.

Demographic variables, including age, sex, weight, surgical severity scores,<sup>3</sup> duration of surgery, and anesthesia were similar in all groups (table 1). No adverse events such as laryngospasm or postoperative respiratory depression (respiratory rate ≤ 16), bronchospasm, or hypoxemia were noted from the study drug administration.

The frequency of agitation scores of 3 and 4 were significantly decreased with nasal fentanyl regardless of inhalation agent used. (35/130 vs. 78/130; *P* < 0.05). The incidence of severe postoperative agitation (agitation score of 4) was significantly less when intranasal fentanyl was administered, regardless of the inhalation anesthetic used (2/130 vs. 22/130; *P* < 0.05; table 2). Similarly, the maximum postoperative heart rate, agitation, and CHEOPS scores were significantly decreased with the use of intranasal fentanyl regardless of the use of halothane or sevoflurane. The times from arrival in the PACU to discharge readiness and actual discharge from phase 1 PACU were increased if fentanyl was administered. However, the use of fentanyl was not associated with an increase in the duration of stay in the phase 2 PACU or in the total time from the end of surgery to discharge readiness and actual discharge from hospital (tables 1 and 2). In addition, there were no differences in the time from the end of the surgical procedure to



**Table 2. Recovery Data**

|                                                | Sevoflurane +<br>Nasal Fentanyl | Sevoflurane +<br>Nasal Placebo | Halothane +<br>Nasal Fentanyl | Halothane +<br>Nasal Placebo |
|------------------------------------------------|---------------------------------|--------------------------------|-------------------------------|------------------------------|
| N                                              | 64                              | 69                             | 66                            | 61                           |
| Number (%) with severe agitation               | 1 (2%)*                         | 16 (23%)                       | 1 (2%)*†                      | 6 (10%)                      |
| Maximum agitation score                        |                                 |                                |                               |                              |
| Median (interquartile range)                   | 1 (0–3)*                        | 3 (2–4)                        | 1 (0–2)*†                     | 3 (1–4)‡                     |
| Mean $\pm$ SD                                  | 1.8 $\pm$ 0.9*                  | 2.7 $\pm$ 1.0                  | 1.6 $\pm$ 0.9*†               | 2.4 $\pm$ 1.0‡               |
| Maximum CHEOPS score                           |                                 |                                |                               |                              |
| Median (interquartile range)                   | 6 (4–8)*                        | 9 (6–12)                       | 6 (4–8)*†                     | 8 (4–12)‡                    |
| Mean $\pm$ SD                                  | 7.3 $\pm$ 1.6*                  | 8.6 $\pm$ 1.8                  | 7.0 $\pm$ 1.5*†               | 8.4 $\pm$ 1.9‡               |
| Maximum heart rate (beats/min)                 | 139 $\pm$ 15*                   | 148 $\pm$ 19                   | 134 $\pm$ 19*†                | 149 $\pm$ 21‡                |
| Time from arrival to discharge readiness (min) |                                 |                                |                               |                              |
| From phase 1 PACU                              | 28 $\pm$ 21*                    | 17 $\pm$ 14                    | 30 $\pm$ 18*†                 | 23 $\pm$ 20                  |
| Enter phase 2 to exit phase 2 PACU             | 31 $\pm$ 21                     | 36 $\pm$ 18                    | 32 $\pm$ 20                   | 33 $\pm$ 16                  |
| Time from arrival to actual discharge (min)    |                                 |                                |                               |                              |
| From phase 1 PACU                              | 36 $\pm$ 20*                    | 26 $\pm$ 15†                   | 39 $\pm$ 16*                  | 34 $\pm$ 18                  |
| Enter phase 2 to exit phase 2 PACU             | 44 $\pm$ 23                     | 53 $\pm$ 23                    | 49 $\pm$ 33                   | 48 $\pm$ 27                  |

\*  $P < 0.05$  versus sevoflurane–placebo group. †  $P < 0.05$  versus halothane–placebo group. ‡  $P < 0.05$  versus sevoflurane–fentanyl group.

CHEOPS = Children's Hospital of Eastern Ontario Pain Scale; PACU = postanesthesia care unit.

discharge readiness and actual discharge from phase 1 and phase 2 of the PACU and from the hospital. The incidence of postoperative emesis in hospital, at home, and during the entire 24-h postoperative period was not increased with the use of fentanyl (table 3). Nurses in both phases 1 and 2 PACU had higher levels of satisfaction with patient behavior in children who received intranasal fentanyl. However, overall parental satisfaction with anesthetic care, which was assessed 24 h after the procedure, did not differ between the four groups.

The incidence of severe postoperative agitation did not differ in placebo-treated patients who underwent anesthesia with halothane or sevoflurane. There were no significant differences in the postoperative maximum heart rate, CHEOPS and agitation scores, times to discharge readiness and actual discharge, and nurses and parent satisfaction assessments in patients who received halothane or sevoflurane. The incidence of emesis while the child was in hospital did not differ significantly between any of the four groups. However, the incidence of emesis at home and during the entire first postoperative 24 h were significantly higher in patients who received halothane.

## Discussion

This study demonstrates that the administration of fentanyl by the intranasal route decreased the incidence of severe emergence agitation without increasing postoperative respiratory depression, emesis, or discharge from the hospital in children undergoing BMT procedures. Because this operation is usually performed without intravenous access, options for providing analgesia and sedation in the PACU are limited. It is difficult to establish vascular access and impractical to use the oral route of drug administration in a combative, disoriented child who is thrashing around. The absorption of drugs administered rectally is too erratic and slow in these patients. Prophylactic therapy has obvious advantages, but the drugs used should be effective, with minimal side effects, given by a route that should be acceptable to the child and economical.

Prophylactic acetaminophen and nonsteroidal anti-inflammatory drugs such as ibuprofen and ketorolac have been administered orally in the preoperative period to provide for postoperative analgesia in this patient population. Preoperative oral acetaminophen 10–15 mg/kg

**Table 3. Postoperative Complications and Satisfaction Scores**

|                                  | Sevoflurane +<br>Nasal Fentanyl | Sevoflurane +<br>Nasal Placebo | Halothane +<br>Nasal Fentanyl | Halothane +<br>Nasal Placebo |
|----------------------------------|---------------------------------|--------------------------------|-------------------------------|------------------------------|
| N                                | 64                              | 69                             | 66                            | 61                           |
| Postoperative emesis (n [%])     |                                 |                                |                               |                              |
| In hospital                      | 12 (19%)                        | 9 (13%)                        | 18 (27%)                      | 12 (20%)                     |
| After discharge                  | 19 (30%)                        | 15 (22%)                       | 34 (52%)*                     | 30 (49%)*                    |
| During first 24 h                | 21 (33%)                        | 20 (29%)                       | 34 (52%)*                     | 32 (52%)*                    |
| Satisfaction scores provided by: |                                 |                                |                               |                              |
| Phase 1 PACU nurse (VAS [mm])    | 82 $\pm$ 25†                    | 53 $\pm$ 36                    | 85 $\pm$ 25†‡                 | 61 $\pm$ 37*                 |
| Phase 2 PACU nurse (VAS [mm])    | 77 $\pm$ 25†                    | 55 $\pm$ 31                    | 80 $\pm$ 25†‡                 | 62 $\pm$ 36*                 |
| Parents (0–10)                   | 9.8 $\pm$ 0.6                   | 9.3 $\pm$ 1.9                  | 9.5 $\pm$ 1.7                 | 9.2 $\pm$ 1.7                |

\*  $P < 0.05$  versus sevoflurane–fentanyl group. †  $P < 0.05$  versus sevoflurane–placebo group. ‡  $P < 0.05$  versus halothane–placebo group.

PACU = postanesthesia care unit; VAS = visual analog scale.

and ibuprofen 10 mg/kg have not been shown to be more effective than placebo, but ketorolac 1 mg/kg by the oral or intravenous route reduced the incidence of postoperative agitation after BMT. However, ketorolac may not be completely effective, as 12–30% of patients still required rescue analgesics.

Previous studies have also examined the efficacy of opioids in preventing postoperative agitation.<sup>2,5</sup> The preoperative administration of oral codeine 1 mg/kg with acetaminophen 10 mg/kg provided superior analgesia compared with oral acetaminophen 15 mg/kg in this patient population.<sup>5</sup> Butorphanol, a synthetic opioid agonist-antagonist, has also been administered by the transnasal route, but is effective only in a dose of 25  $\mu$ g/kg.<sup>2</sup> It is unclear if the improvement in postoperative behavior after prophylactic opioid therapy reflects better analgesia or greater sedation. The need for rescue therapy in the PACU after preoperative oral ketorolac may be a reflection of inadequate sedation or analgesia.<sup>3,12,16</sup>

Both ketorolac and butorphanol are relatively expensive drugs, and the use of these to achieve only a slight improvement in analgesia may not be cost-effective, given the large number of BMT procedures performed in this country.<sup>2,16</sup> Fentanyl is an inexpensive generic synthetic opioid, and intranasal administration avoids the costs of equipment and time taken to establish vascular access in all children who undergo BMT, an operation that typically takes less than 10 min to perform. Intranasal administration of fentanyl immediately after induction avoids the need for patient cooperation without causing clinically important delays in the onset of action.

Gourlay *et al.*<sup>26</sup> studied adults who received fentanyl by patient-controlled analgesia after intra-abdominal procedures. These investigators noted that the minimum effective concentration for analgesia was  $0.63 \pm 0.25$  ng/ml (mean  $\pm$  SD). There are no similar data available for the pediatric patient population. The mean serum fentanyl concentrations that we determined in the first phase of our study equaled or exceeded these values at both time points. However, conclusions regarding the relation between postoperative behavior and blood concentrations of fentanyl should not be based on the data obtained in our study and would require a more extensive dose-response curve with a larger number of patients. The values from the adult fentanyl patient-controlled analgesia study represent steady state concentrations, unlike the values from our study.<sup>26</sup> Finally, it is still unclear if the blood concentrations of fentanyl required to prevent postoperative agitation should be adequate to provide analgesia or only sedation.

There are concerns that the routine use of intranasal fentanyl in the BMT patient population will be associated with increased side effects such as prolonged emergence, emesis, respiratory depression, and laryngospasm. Although the use of fentanyl prolonged the duration of stay in phase 1 PACU by 7–10 min, the time

from the end of surgery to arrival in the PACU and to the time patients were ready to be discharged and actually discharged from hospital did not differ between the study groups. The use of fentanyl did not increase intraoperative laryngospasm, postoperative emesis, oxygen requirements in the PACU, or the incidence of hypoventilation (respiratory rates  $\leq 16$  breaths/min) in our study. However, we studied only healthy patients, and the dose of fentanyl may need adjustment in children with ASA physical status III and IV, particularly if they have impaired respiratory control and airway obstruction (e.g., children with developmental delay or abnormal airways). We also did not note any clinically important changes in ventilatory compliance after nasal fentanyl 2  $\mu$ g/kg, but this has been reported in children receiving nasal sufentanil, 4.5  $\mu$ g/kg, for preanesthetic sedation.<sup>1</sup> Larger studies may be needed to show significant differences in the incidence of infrequent events such as laryngospasm, chest wall rigidity, and upper airway obstruction when nasal fentanyl is administered during sevoflurane or halothane anesthesia.

Sevoflurane, a potent inhalation agent with low blood-gas solubility, has become very popular in pediatric anesthesia because it provides a rapid, smooth induction, a faster emergence, and is associated with decreased cardiac depression compared with halothane.<sup>7</sup> decreased incidence of emesis with sevoflurane compared with halothane was noted in our study and another study of children undergoing ear-nose-throat surgery, but is not a consistent finding in all studies comparing these inhalation agents.<sup>7,8,13,27</sup> There are more consistent reports of increased agitation on emergence after sevoflurane,<sup>4,7</sup> even if adequate postoperative analgesia was provided by a regional block.<sup>6,8</sup> Very rapid emergence from anesthesia may not be as desirable in children compared with adults, particularly if associated with increased emergence agitation. The benefits gained in improved operating-room efficiency from a 2–3 min earlier awakening are lost because a combative, disoriented child requires additional nursing care in the PACU to prevent self-injury.

Our study also demonstrated that the use of sevoflurane was not associated with increased postoperative agitation compared with halothane when nasal fentanyl was used (2% for both groups). These results are in agreement with other investigations in children who received midazolam during BMT procedures.<sup>3,13</sup> However, in other studies the incidence of agitation on emergence was higher with sevoflurane in BMT patients who did not receive preanesthetic medication with midazolam and in patient populations undergoing other procedures.<sup>4,7</sup> It is possible that a larger study would have detected a statistically significant difference in the rates of emergence agitation in the placebo groups (23% *vs.* 10% for sevoflurane and halothane, respectively;  $P = 0.06$ ).

In conclusion, this study has shown that the administration of fentanyl, 2 µg/kg by the intranasal route, results in serum concentrations that are associated with adequate analgesia in adults. The intranasal administration of fentanyl was associated with decreased agitation in the PACU, decreased CHEOPS scores, a slightly longer stay in the phase 1 PACU, and greater satisfaction among the PACU nurses caring for the child. There were no differences in the total hospital stay or in the incidence of postoperative emesis, respiratory depression, and oxygen requirements. Postoperative agitation, CHEOPS pain scores, and duration of hospital stay did not differ in patients receiving halothane or sevoflurane. Anesthesiologists should consider the use of nasal fentanyl in children undergoing BMT procedures.

The authors acknowledge the inspiration for this study provided by Drs. Pina Templeton, A. Michael Broennle, Thomas P. Keon, and Mark Schreiner; and Katie Harris, R.N., and the other nurses at Children's Hospital of Philadelphia for their assistance and patience.

## References

- Isaacson G, Rosenfeld RM: Care of the child with tympanostomy tubes. *Pediatr Clin North Am* 1996; 43:1183-93
- Bennie RE, Boehringer LA, Dierdorf SF, Hanna MP, Means LJ: Transnasal butorphanol is effective for postoperative pain relief in children undergoing myringotomy. *ANESTHESIOLOGY* 1998; 89:385-90
- Davis PJ, Greenberg JA, Gendelman M, Fertil K: Recovery characteristics of sevoflurane and halothane in preschool-aged children undergoing bilateral myringotomy and pressure equalization tube insertion. *Anesth Analg* 1999; 88:34-8
- Lapin SL, Auden SM, Goldsmith LJ, Reynolds AM: Effects of sevoflurane anaesthesia on recovery in children: A comparison with halothane. *Paediatr Anaesth* 1999; 9:299-304
- Tobias JD, Lowe S, Hersey S, Rasmussen GE, Werkhaven J: Analgesia after bilateral myringotomy and placement of pressure equalization tubes in children: Acetaminophen versus acetaminophen with codeine. *Anesth Analg* 1995; 81:496-500
- Aono J, Ueda W, Mamiya K, Takimoto E, Manabe M: Greater incidence of delirium during recovery from sevoflurane anesthesia in preschool boys. *ANESTHESIOLOGY* 1997; 87:1298-1300
- Lerman J, Davis PJ, Welborn LG, Orr RJ, Rabb M, Carpenter R, Motoyama E, Hannallah R, Haberkern CM: Induction, recovery, and safety characteristics of sevoflurane in children undergoing ambulatory surgery: A comparison with halothane. *ANESTHESIOLOGY* 1996; 84:1332-40
- Johannesson GP, Floren M, Lindahl SG: Sevoflurane for ENT-surgery in children: A comparison with halothane. *Acta Anaesthesiol Scand* 1995; 39:546-50
- Dyer CB, Ashton CM, Teasdale TA: Postoperative delirium: A review of 80 primary data-collection studies. *Arch Intern Med* 1995; 155:461-5
- Garfield JM, Garfield FB, Stone JG, Hopkins D, Johns LA: A comparison of psychologic responses to ketamine and thiopental-nitrous oxide-halothane anesthesia. *ANESTHESIOLOGY* 1972; 36:329-38
- Orobello PW Jr, Park RI, Wetzel RC, Belcher LJ, Naclerio RM: Phenol as an adjuvant anesthetic for tympanostomy tube insertion. *Int J Pediatr Otorhinolaryngol* 1991; 21:51-8
- Watcha MF, Ramirez-Ruiz M, White PF, Jones MB, Lagueruela RG, Terkonda RP: Perioperative effects of oral ketorolac and acetaminophen in children undergoing bilateral myringotomy. *Can J Anaesth* 1992; 39:649-54
- Welborn LG, Hannallah RS, Norden JM, Ruttimann UE, Callan CM: Comparison of emergence and recovery characteristics of sevoflurane, desflurane, and halothane in pediatric ambulatory patients. *Anesth Analg* 1996; 83:917-20
- Davis PJ, Cohen IT, McGowan FXJ, Latta K: Recovery characteristics of desflurane versus halothane for maintenance of anesthesia in pediatric ambulatory patients. *ANESTHESIOLOGY* 1994; 80:298-302
- Beyer JE, McGrath PJ, Berde CB: Discordance between self-report and behavioral pain measures in children aged 3-7 years after surgery. *J Pain Symptom Manage* 1990; 5:350-6
- Bean-Lijewski JD, Stinson JC: Acetaminophen or ketorolac for post-myringotomy pain in children? A prospective, double-blinded comparison. *Paediatr Anaesth* 1997; 7:131-7
- Bennie RE, Boehringer LA, McMahon S, Allen H, Dierdorf SF: Postoperative analgesia with preoperative oral ibuprofen or acetaminophen in children undergoing myringotomy. *Paediatr Anaesth* 1997; 7:399-403
- Henderson JM, Brodsky DA, Fisher DM, Brett CM, Hertzka RE: Pre-induction of anesthesia in pediatric patients with nasally administered sufentanil. *ANESTHESIOLOGY* 1988; 68:671-5
- Haynes G, Brahen NH, Hill HF: Plasma sufentanil concentration after intranasal administration to paediatric outpatients [letter]. *Can J Anaesth* 1993; 40:286
- Karl HW, Keifer AT, Rosenberger JL, Larach MG, Ruffe JM: Comparison of the safety and efficacy of intranasal midazolam or sufentanil for preinduction of anesthesia in pediatric patients. *ANESTHESIOLOGY* 1992; 76:209-15
- Striebel HW, Olmann T, Spies C, Brummer G: Patient-controlled intranasal analgesia (PCINA) for the management of postoperative pain: A pilot study. *J Clin Anesth* 1996; 8:4-8
- Tobias JD, Rasmussen GE: Transnasal butorphanol for postoperative analgesia following paediatric surgery in a Third World country. *Paediatr Anaesth* 1995; 5:63-6
- Vercauteren M, Boeckx E, Hanegreefs G, Noorduyn H, Vanden Bussche C: Intranasal sufentanil for pre-operative sedation. *Anaesthesia* 1988; 43:270-3
- Michiels M, Hendriks R, Heykants J: A sensitive radioimmunoassay for fentanyl: Plasma level in dogs and man. *Eur J Clin Pharmacol* 1977; 12:153-8
- Stein PR: Indices of pain intensity: Construct validity among preschoolers. *Pediatr Nursing* 1995; 21:119-23
- Gourlay GK, Kowalski SR, Plummer JL, Cousins MJ, Armstrong PJ: Fentanyl blood concentration-analgesic response relationship in the treatment of postoperative pain. *Anesth Analg* 1988; 67:329-37
- Rieger A, Schroter G, Philippi W, Hass I, Eylich K: A comparison of sevoflurane with halothane in outpatient adenoidectomy in children with mild upper respiratory tract infections. *J Clin Anesth* 1996; 8:188-97
